# Supplementary material
Source: PubMed Central journal article supplement (PMC3228095)
Supplement: supp_the2010-0305_Mueller_supplemental_material.pdf [file supp_the2010-0305_Mueller_supplemental_material.pdf]

| Clinico-pathological data at time of surgery |            |       |     |           |           |                                                              | Primary tumor site identified by miRNA Profile        |                    |                                    |         |           |                                                  |
|----------------------------------------------|------------|-------|-----|-----------|-----------|--------------------------------------------------------------|-------------------------------------------------------|--------------------|------------------------------------|---------|-----------|--------------------------------------------------|
| Patient #                                    | Specimen # | ID HD | Sex | Diagnosis | Ca in PMH | primary tumor site based on pathology and IH                 | primary tumor site based on additional investigations | Suggested origin 1 | Suggested origin 2                 | Score   | Score a/b | 1st Immunohistochemical phenotype                |
| 1                                            | 1          | 130   | f   | CUP       | -         | Lung                                                         |                                                       | lung-Adeno_large   | thyroid-follicular                 | 1       | -         | TTF1 pos., TG neg., CK7 pos., CK20 neg.          |
| 2                                            | 2          | 131   | f   | CUP       | -         | Lung (SCLC)                                                  |                                                       | lung               | N/A                                | 1       | -         | TTF1 pos., TG neg., Syn pos., NSE pos.           |
| 3                                            | 3          | 133   | m   | MET       | bladder   | Lung                                                         |                                                       | thyroid-papillary  | lung-Adeno_large                   | 1       | -         | TTF1 pos., CK7 pos., CK20 neg., CK5/6 neg.       |
| 4                                            | 4          | 136   | f   | CUP       | -         | Lung vs. Thyroid                                             |                                                       | ovary-Endometrioid | lung-Adeno_large                   | 1       | -         | TTF1 pos., Mammaglobin neg., TG neg.             |
| 5                                            | 5          | 137   | m   | MET       | prostate  | Lung                                                         |                                                       | lung-small cell    | N/A                                | 1       | -         | TTF1 pos., TG neg., PSA/PSAP neg., Surfacta      |
| 6                                            | 6          | 138   | m   | CUP       | -         | pathology fails to identify primary                          |                                                       | lung-small cell    | N/A                                | 1       | -         | TTF1 neg., Syn neg., TTF1 neg., Syn neg.         |
| 7                                            | 7          | 139   | f   | CUP       | -         | Lung (SCLC)                                                  |                                                       | lung-small cell    | N/A                                | 1       | -         | TTF1 pos., NSE/Syn/CD56 pos.                     |
| 8                                            | 8          | 141   | m   | CUP       | -         | Lung                                                         |                                                       | lung-small cell    | N/A                                | 1       | -         | TTF1 pos., PSA neg., Syn neg., NSE pos.          |
| 9                                            | 9          | 143   | m   | CUP       | -         | Ovarian vs. Uterus vs. Stomach                               |                                                       | colon              | stomach_esophagus-Adeno            | 1       | -         | CK7 pos., CK20 pos., CDX2 neg., CK5/6 neg.       |
| 10                                           | 10         | 144   | m   | CUP       | -         | Lung (SCLC)                                                  |                                                       | lung-small cell    | prostate                           | 1       | -         | TTF1 pos., CK7 pos., CK20 neg., TG neg.          |
| 11                                           | 11         | 145   | m   | CUP       | -         | Lung (Adeno-Ca)                                              |                                                       | lung-Adeno_large   | N/A                                | 1       | -         | TTF1 pos., CK7 pos., CK8/18 pos., CK19 pos.      |
| 12                                           | 12         | 146   | m   | CUP       | -         | Lung (NSCLC/ neuroendocrine)                                 |                                                       | head_neck          | lung-squamous                      | 1       | -         | TTF1 neg., TG neg., CK5/6 neg., CK20 neg., C     |
| 13                                           | 13         | 148   | f   | CUP       | -         | Lung (Adeno-Ca)                                              |                                                       | lung-Adeno_large   | breast                             | 1       | -         | TTF1 pos., HMB45 neg., AE1/3/CL1 pos., CK7       |
| 14                                           | 14         | 151   | m   | CUP       | -         | Lung (Adenopapillary-Ca)                                     | Lung (SCLC)                                           | lung-small cell    | N/A                                | 1       | -         | TTF1 pos., CK7 pos., TTF1 pos., CK7 pos.         |
| 15                                           | 15         | 153   | m   | CUP       | -         | Adeno-Ca of unknown provenience                              |                                                       | colon              | N/A                                | 1       | -         | no immunohistochemistry                          |
| 16                                           | 16         | 155   | f   | CUP       | -         | Lung (Neuroendocrine-Ca) vs. Colorectal- Ca                  |                                                       | lung-small cell    | N/A                                | 1       | -         | TTF1 pos., CD56 pos., MAP2 pos., Enolase p       |
| 17                                           | 17         | 156   | m   | CUP       | -         | Kidney (Renal Cell- Ca later diagnosis changed into chordoma |                                                       | kidney             | N/A                                | 1       | -         | TTF1 neg., CEA neg., PSA neg., PNRA neg., M      |
| 18                                           | 18         | 159   | m   | CUP       | -         | Kidney (Renal Cell- Ca)                                      |                                                       | kidney             | N/A                                | 1       | -         | AE1/3 pos., KL1 pos., Vimentin pos., PNRA po     |
| 19                                           | 19         | 161   | m   | CUP       | -         | Skin (amelanotic malignant melanoma)                         |                                                       | melanoma           | N/A                                | 1       | -         | HMB45 pos., S100 pos., Vimentin pos.             |
| 20                                           | 20         | 164   | f   | CUP       | -         | Breast vs. Lung (Squamous cell Ca)                           |                                                       | thyroid-medullary  | lung-Adeno_large                   | 1       | -         | no immunohistochemistry                          |
| 21                                           | 21         | 172   | f   | CUP       | -         | Lung (Adeno-Ca)                                              |                                                       | thyroid-medullary  | lung-Adeno_large                   | 1       | -         | no immunohistochemistry                          |
| 21                                           | 22         | 173   | f   | CUP       | -         | Lung (Adeno-Ca)                                              |                                                       | ovary-Endometrioid | lung-Adeno_large                   | 1       | -         | no immunohistochemistry                          |
| 21                                           | 23         | 174   | f   | CUP       | -         | Lung (Adeno-Ca)                                              |                                                       | lung-Adeno_large   | N/A                                | 1       | -         | no immunohistochemistry                          |
| 22                                           | 24         | 128   | m   | CUP       | -         | Lung (SCLC)                                                  |                                                       | lung               | N/A                                | 1       | -         | TTF1 pos., Syn pos., NSE pos., MIB 95%           |
| 23                                           | 25         | 124   | m   | CUP       | -         | Lung                                                         |                                                       | head_neck          | lung-squamous                      | 2       | a         | CK7 pos., CK20 neg., TTF1 neg., CDX2 neg., I     |
| 24                                           | 26         | 126   | f   | MET       | breast    | Lung                                                         |                                                       | head_neck          | lung-Adeno_large                   | 2       | a         | TTF1 focally pos., mammaglobin neg., ER/PR       |
| 25                                           | 27         | 134   | f   | CUP       | -         | Lung (NSCLC)                                                 |                                                       | ovary-Endometrioid | lung-Adeno_large                   | 2       | a         | TTF1 pos., CK7 pos., CK5/6 neg., Chromogran      |
| 26                                           | 28         | 135   | m   | MET       | prostate  | Lung (SCLC)                                                  |                                                       | lung-small cell    | N/A                                | 2       | a         | TTF1 pos., CK7 neg., CK5/6 neg., PSA/PSAP        |
| 27                                           | 29         | 140   | f   | CUP       | -         | Lung vs. Thyroid                                             |                                                       | lung               | N/A                                | 2       | a         | TTF1 pos., Mammaglobin neg., ER/PR neg., C       |
| 28                                           | 30         | 154   | m   | CUP       | -         | Kidney (Renal Cell Ca)                                       |                                                       | kidney             | N/A                                | 2       | a         | Vim pos., KL1 pos., S100 pos.,                   |
| 29                                           | 31         | 160   | f   | CUP       | -         | GI- tract (Adeno-Ca)                                         |                                                       | thyroid-medullary  | stomach_esophagus-Adeno            | 2       | a         | no immunohistochemistry                          |
| 30                                           | 32         | 165   | f   | CUP       | -         | pathology fails to identify primary                          |                                                       | lung-small cell    | N/A                                | 2       | a         | pos.: Lu5; neg.: Synapto., Chromogranin          |
| 31                                           | 33         | 176   | f   | CUP       | -         | Kidney (Renal Cell-Ca)                                       |                                                       | kidney             | melanoma                           | 2       | a         | no immunohistochemistry                          |
| 32                                           | 34         | 178   | m   | CUP       | -         | Lung (squamous cell Ca)                                      | Lung (SCLC)                                           | lung-small cell    | head_neck                          | 2       | a         | no immunohistochemistry                          |
| 33                                           | 35         | 179   | m   | CUP       | -         | Lung (Adeno-Ca)                                              |                                                       | lung-Adeno_large   | N/A                                | 2       | a         | no immunohistochemistry                          |
| 34                                           | 36         | 180   | m   | CUP       | -         | Lung (Adeno- vs. Squamous cell Ca)                           |                                                       | lung-Adeno_large   | N/A                                | 2       | a         | no immunohistochemistry                          |
| 35                                           | 37         | 182   | m   | CUP       | -         | Stomach (Cardia-Ca)                                          |                                                       | lung-carcinoid     | stomach_esophagus-Adeno            | 2       | a         | no immunohistochemistry                          |
| 36                                           | 38         | 184   | m   | CUP       | -         | pathology fails to identify primary                          |                                                       | breast             | lung-Adeno_large                   | 2       | a         | S100 neg., Melan A neg., Lu5 pos.                |
| 37                                           | 39         | 157   | f   | CUP       | -         | pathology fails to identify primary                          |                                                       | ovary-Endometrioid | lung-Adeno_large                   | 2       | b         |                                                  |
| 38                                           | 40         | 166   | f   | LYMPHOMA  | -         | pathology fails to identify primary                          |                                                       | lung-small cell    | melanoma                           | 2       | b         | Syn pos., CD20/CD3/LCA neg., AE1/3/Lu5/KL        |
| 39                                           | 41         | 168   | m   | CUP       | -         | unidentified site (malignant neuroendocrine tumor)           |                                                       | lung-carcinoid     | N/A                                | 2       | b         | KL1 pos., AE1/3 neg., KL1 pos., AE1/3 neg.       |
| 39                                           | 42         | 169   | m   | CUP       | -         | unidentified site (malignant neuroendocrine tumor)           |                                                       | lung-carcinoid     | N/A                                | 2       | b         | KL1 pos., AE1/3 neg., KL1 pos., AE1/3 neg.       |
| 40                                           | 43         | 181   | f   | CUP       | -         | Stomach (Signet-ring cell- Ca)                               |                                                       | colon              | biliary_track_carcinoma - nonLiver | 2       | b         | Lu5 pos., Vim pos., EMA pos                      |
| 41                                           | 44         | 127   | m   | CUP       | -         | Lung                                                         |                                                       | head_neck          | thymus                             | 3       | -         | TTF1 pos., TG neg., TTF1 pos., TG neg.           |
| 42                                           | 45         | 149   | f   | CUP       | -         | Kidney (Renal Cell-Ca)                                       |                                                       | breast             | lung-Adeno_large                   | 3       | -         | AE1/3 pos., KL1 (also cytokeratin) pos.          |
| 43                                           | 46         | 177   | f   | CUP       | -         | GI-tract (Adeno-Ca)                                          | Lung (Adeno-Ca)                                       | breast             | thyroid-medullary                  | 3       | -         | no immunohistochemistry                          |
| 44                                           | 47         | 185   | f   | CUP       | -         | Breast                                                       |                                                       | lung-small cell    | head_neck                          | 3       | -         | no immunohistochemistry                          |
| 45                                           | 48         | 132   | m   | CUP       | -         | GI- tract vs. Lung                                           |                                                       | head_neck          | N/A                                | 4       | -         | TTF1 neg., TG neg., CK7 pos., CEA pos., CK2      |
| 46                                           | 49         | 142   | m   | MET       | NSCLC     | Squamous cell Ca. (Lung?)                                    |                                                       | head_neck          | N/A                                | 4       | -         | TTF1 neg., CK5/6 pos., CK7 neg., CK8/18 pos      |
| 47                                           | 50         | 147   | m   | GLIOMA    | -         | Lung (Adeno-Ca vs. Squamous cell Ca)                         |                                                       | head_neck          | N/A                                | 4       | -         | TTF1 pos., TG neg., CK20 pos., CK5/6 pos.        |
| 48                                           | 51         | 150   | m   | MET       | prostate  | Urothelial Ca (Prostate- Ca ruled out)                       |                                                       | lung-small cell    | N/A                                | 4       | -         | UAE pos., CK13/Syn/Chrom. neg., PSA neg.         |
| 49                                           | 52         | 152   | m   | GLIOMA    | -         | Lung (NSCLC)                                                 |                                                       | melanoma           | kidney                             | 4       | -         | TTF1 pos., CK14 pos., TTF1 pos., CK14 pos.,      |
| 50                                           | 53         | 175   | f   | CUP       | -         | Lung (Squamous cell Ca)                                      |                                                       | head_neck          | N/A                                | 4       | -         | no immunohistochemistry                          |
| 51                                           | 54         | 162   | m   | GLIOMA    | -         | pathology fails to identify primary                          |                                                       | head_neck          | N/A                                | unknown | -         | no immunohistochemistry                          |
| 52                                           | 55         | 163   | m   | CUP       | -         | pathology fails to identify primary                          |                                                       | head_neck          | N/A                                | unknown | -         | no immunohistochemistry                          |
| 53                                           | 56         | 171   | m   | CUP       | -         | pathology fails to identify primary                          |                                                       | breast             | lung-small cell                    | unknown | -         | Lu5 pos., Lu5 pos., Lu5 pos., Lu5 pos., Lu5 pos. |
| 54                                           | 57         | 183   | f   | CUP       | -         | Lung vs. Ovar (Adeno-Ca)                                     |                                                       | lung-squamous      | head_neck                          | unknown | -         | no immunohistochemistry                          |

| Clinco- pathological data after clinical work-up following surgery |                                            |                                               |                                                                       |
|--------------------------------------------------------------------|--------------------------------------------|-----------------------------------------------|-----------------------------------------------------------------------|
| 2nd line Immunohistochemistry                                      | clinically verified origin                 | histologically verified origin                | Comment                                                               |
|                                                                    | Lung                                       | -                                             | -                                                                     |
|                                                                    | Lung (SCLC)                                | -                                             | tumor- suggestive lesion in lung                                      |
|                                                                    | Lung                                       | -                                             | -                                                                     |
|                                                                    | Lung (Adeno-Ca)                            | Lung (Adeno-Ca)                               | -                                                                     |
|                                                                    | Lung                                       | -                                             | tumor- suggestive lesion in lung                                      |
|                                                                    | Lung                                       | cytology from BAL with tumor suggestive cells | tumor suggestive lesion in lung                                       |
|                                                                    | Lung (SCLC)                                | cytology from BAL with tumor suggestive cells | tumor suggestive lesion in lung                                       |
|                                                                    | Lung (SCLC)                                | -                                             | tumor suggestive lesion in lung                                       |
|                                                                    | Stomach-Ca                                 | Stomach-Ca (Adeno-Ca)                         | -                                                                     |
|                                                                    | Lung (SCLC)                                | Lung (SCLC)                                   | -                                                                     |
|                                                                    | Lung                                       | -                                             | tumor suggestive lesion in lung                                       |
|                                                                    | Lung                                       | -                                             | tumor suggestive lesion in lung                                       |
|                                                                    | Lung                                       | -                                             | tumor suggestive lesion in lung, clinically tTyroid Ca also suspected |
| pos.: AE1/3, Synaptophysin, Chromogranin                           | Lung                                       | -                                             | tumor suggestive lesion in lung                                       |
|                                                                    | GI-tract, (Rectum -Ca)                     | GI-tract, (Rectum -Ca)                        | -                                                                     |
|                                                                    | Lung (SCLC)                                | Lung (SCLC)                                   | patient dead                                                          |
|                                                                    | Renal cell carcinoma                       | Renal cell carcinoma                          | -                                                                     |
|                                                                    | Renal cell carcinoma and stomach cancer    | Renal cell carcinoma and stomach cancer       | -                                                                     |
|                                                                    | amelanotic malignant melanoma              | amelanotic malignant melanoma                 | primary skin lesion not found                                         |
|                                                                    | lung cancer                                | -                                             | tumor suggestive lymph nodes in lung hilus                            |
|                                                                    | Lung (Adeno-Ca)                            | -                                             | Lung (Adeno-Ca) documented                                            |
|                                                                    | Lung (Adeno-Ca)                            | -                                             | Lung (Adeno-Ca) documented                                            |
|                                                                    | Lung (Adeno-Ca)                            | -                                             | Lung (Adeno-Ca) documented                                            |
|                                                                    | SCLC                                       | -                                             | tumor- suggestive lesion in lung                                      |
|                                                                    | Breast- Ca                                 | Breast- Ca diagnosis in 2002                  | no work- up for potential primary lung tumor                          |
|                                                                    | -                                          | -                                             | -                                                                     |
|                                                                    | no data on clinical work- up; patient dead | -                                             | -                                                                     |
|                                                                    | no primary found to date                   | no primary tumor found to date                | -                                                                     |
|                                                                    | no verified tumor                          | -                                             | tumor-suspectve lesion in lung                                        |
|                                                                    | no clinical follow up                      | -                                             | -                                                                     |
|                                                                    | no data on clinical work-up                | -                                             | stereotactic biopsy                                                   |
|                                                                    | no clinically verified primary tumor site  | -                                             | -                                                                     |
| pos.: AE1/3; CK7; Mib1: 85%neg.; CK5/6;                            | no data on clinical work-up                | -                                             | -                                                                     |
|                                                                    | no clinically verified primary tumor site  | -                                             | stereotactic biopsy                                                   |
|                                                                    | no clinically verified primary tumor site  | -                                             | -                                                                     |
|                                                                    | no clinically verified primary tumor site  | -                                             | -                                                                     |
|                                                                    | no clinically verified primary tumor site  | -                                             | -                                                                     |
|                                                                    | no primary found to date                   | -                                             | -                                                                     |
|                                                                    | no data on clinical work-up                | -                                             | stereotactic biopsy                                                   |
|                                                                    | -                                          | -                                             | -                                                                     |
|                                                                    | no clinically verified primary tumor site  | -                                             | -                                                                     |
|                                                                    | -                                          | -                                             | -                                                                     |
|                                                                    | no primary found to date                   | -                                             | -                                                                     |
| pos.: AE1/3, CK7, TTF1, Mib1: 30%; neg.                            | no data on clinical work-up                | -                                             | -                                                                     |
| pos.: CK7; MG; neg.: CK5/6; CK20; TTF                              | no data on clinical work-up                | -                                             | -                                                                     |
|                                                                    | Lung                                       | -                                             | tumor- suggestive lesion in the lung                                  |
|                                                                    | Lung                                       | Lung                                          | -                                                                     |
|                                                                    | Lung                                       | -                                             | tumor- suggestive lesion in lung                                      |
|                                                                    | Prostate-Ca                                | Prostate-Ca                                   | -                                                                     |
|                                                                    | Lung                                       | -                                             | tumor- suggestive lesion in lung                                      |
|                                                                    | Lung                                       | -                                             | tumor- suggestive lesion in lung                                      |
|                                                                    | no primary found to date                   | -                                             | -                                                                     |
|                                                                    | Lung                                       | -                                             | tumor- suggestive lesion in lung                                      |
|                                                                    | no data on clinical work-up                | -                                             | -                                                                     |
|                                                                    | no data on clinical work-up                | -                                             | -                                                                     |
